# Supplementary material for: Biodiversity–stability relationships strengthen over time in a long-term grassland experiment
Source: PubMed Central journal article supplement (PMC9751076; doi:10.1038/s41467-022-35189-2), 2022-12-14
Supplement: 41467_2022_35189_MOESM1_ESM.pdf [file 41467_2022_35189_MOESM1_ESM.pdf]

## Supplementary Information

### **Biodiversity–stability relationships strengthen over time in a long-term grassland experiment**

Cameron Wagg\*, Christiane Roscher, Alexandra Weigelt, Anja Vogel, Anne Ebeling, Enrica de Luca, Anna Roeder, Clemens Kleinspehn, Vicky M. Temperton, Sebastian T. Meyer, Michael Scherer-Lorenzen, Nina Buchmann, Markus Fischer, Wolfgang W. Weisser, Nico Eisenhauer, Bernhard Schmid\*

**Table S1.** Plant species and their functional group (FG) identities.

| Species name                 | FG         | Species name                   | FG         |
|------------------------------|------------|--------------------------------|------------|
| <i>Alopecurus pratensis</i>  | Grass      | <i>Glechoma hederacea</i>      | Short herb |
| <i>Anthoxanthum odoratum</i> | Grass      | <i>Leontodon autumnalis</i>    | Short herb |
| <i>Arrhenatherum elatius</i> | Grass      | <i>Leontodon hispidus</i>      | Short herb |
| <i>Avenula pubescens</i>     | Grass      | <i>Plantago lanceolata</i>     | Short herb |
| <i>Bromus erectus</i>        | Grass      | <i>Plantago media</i>          | Short herb |
| <i>Bromus hordeaceus</i>     | Grass      | <i>Primula veris</i>           | Short herb |
| <i>Cynosurus cristatus</i>   | Grass      | <i>Prunella vulgaris</i>       | Short herb |
| <i>Dactylis glomerata</i>    | Grass      | <i>Ranunculus repens</i>       | Short herb |
| <i>Festuca pratensis</i>     | Grass      | <i>Taraxacum officinale</i>    | Short herb |
| <i>Festuca rubra</i>         | Grass      | <i>Veronica chamaedrys</i>     | Short herb |
| <i>Holcus lanatus</i>        | Grass      | <i>Achillea millefolium</i>    | Tall herb  |
| <i>Luzula campestris</i>     | Grass      | <i>Anthriscus sylvestris</i>   | Tall herb  |
| <i>Phleum pratense</i>       | Grass      | <i>Campanula patula</i>        | Tall herb  |
| <i>Poa pratensis</i>         | Grass      | <i>Cardamine pratensis</i>     | Tall herb  |
| <i>Poa trivialis</i>         | Grass      | <i>Carum carvi</i>             | Tall herb  |
| <i>Trisetum flavescens</i>   | Grass      | <i>Centaurea jacea</i>         | Tall herb  |
| <i>Lathyrus pratensis</i>    | Legume     | <i>Cirsium oleraceum</i>       | Tall herb  |
| <i>Lotus corniculatus</i>    | Legume     | <i>Crepis biennis</i>          | Tall herb  |
| <i>Medicago lupulina</i>     | Legume     | <i>Daucus carota</i>           | Tall herb  |
| <i>Medicago varia</i>        | Legume     | <i>Galium mollugo</i>          | Tall herb  |
| <i>Onobrychis viciifolia</i> | Legume     | <i>Geranium pratense</i>       | Tall herb  |
| <i>Trifolium campestre</i>   | Legume     | <i>Heracleum sphondylium</i>   | Tall herb  |
| <i>Trifolium dubium</i>      | Legume     | <i>Knautia arvensis</i>        | Tall herb  |
| <i>Trifolium fragiferum</i>  | Legume     | <i>Leucanthemum vulgare</i>    | Tall herb  |
| <i>Trifolium hybridum</i>    | Legume     | <i>Pastinaca sativa</i>        | Tall herb  |
| <i>Trifolium pratense</i>    | Legume     | <i>Pimpinella major</i>        | Tall herb  |
| <i>Trifolium repens</i>      | Legume     | <i>Ranunculus acris</i>        | Tall herb  |
| <i>Vicia cracca</i>          | Legume     | <i>Rumex acetosa</i>           | Tall herb  |
| <i>Ajuga reptans</i>         | Short herb | <i>Sanguisorba officinalis</i> | Tall herb  |
| <i>Bellis perennis</i>       | Short herb | <i>Tragopogon pratensis</i>    | Tall herb  |

**Table S2.** Experimental design where numbers indicate the number of plots per plant functional group richness (FGR) and sown plant species richness (SR) levels.

| SR    | FGR |    |    |    | Total |
|-------|-----|----|----|----|-------|
|       | 1   | 2  | 3  | 4  |       |
| 1     | 16  |    |    |    | 16    |
| 2     | 8   | 8  |    |    | 16    |
| 4     | 4   | 4  | 4  | 4  | 16    |
| 8     | 4   | 4  | 4  | 4  | 16    |
| 16    | 2   | 4  | 4  | 4  | 14    |
| Total | 34  | 20 | 12 | 12 | 78    |

**Table S3.** Mixed-model ANOVA results for assessing the changes in the species richness–community productivity (square-root transformed) and the species richness–relative yield (log-transformed) relationship (see also Fig. 1a and b). Species richness was always log-transformed ( $SR_{\log}$ ) and the change in the effect of richness was assessed using year as a linear term ( $Y_{\text{linear}}$ ) followed by year as a factor with 17 levels ( $Y_{\text{factor}}$ ). Tests for significance are two-sided.

| Fixed                                | Productivity |                         |          |                       | Relative yield          |          |                       |
|--------------------------------------|--------------|-------------------------|----------|-----------------------|-------------------------|----------|-----------------------|
|                                      | <i>DF</i>    | <i>DF<sub>den</sub></i> | <i>F</i> | <i>P</i>              | <i>DF<sub>den</sub></i> | <i>F</i> | <i>P</i>              |
| $SR_{\log}$                          | 1            | 71.3                    | 69.45    | $4.08 \cdot 10^{-12}$ | 71.2                    | 80.62    | $2.54 \cdot 10^{-13}$ |
| $Y_{\text{linear}}$                  | 1            | 440.0                   | 354.30   | $< 2 \cdot 10^{-16}$  | 437.1                   | 65.96    | 0.076                 |
| $Y_{\text{factor}}$                  | 15           | 1074.8                  | 18.08    | $< 2 \cdot 10^{-16}$  | 1072.1                  | 6.55     | $1.42 \cdot 10^{-13}$ |
| $SR_{\log} \times Y_{\text{linear}}$ | 1            | 329.9                   | 8.34     | 0.004                 | 331.1                   | 44.29    | $1.18 \cdot 10^{-10}$ |
| $SR_{\log} \times Y_{\text{factor}}$ | 15           | 1074.8                  | 1.40     | 0.138                 | 1072.1                  | 2.11     | 0.008                 |
| Random                               | Var.         |                         | SE       |                       | Var ( $10^{-3}$ )       |          | SE ( $10^{-3}$ )      |
| Block                                | 0.39         |                         | 0.84     |                       | 2.23                    |          | 4.32                  |
| Plot                                 | 8.97         |                         | 2.07     |                       | 43.22                   |          | 9.79                  |
| Residual                             | 20.17        |                         | 1.18     |                       | 93.76                   |          | 5.37                  |
| Year $\rho_{AR1}$                    | 0.51         |                         | 0.03     |                       | 0.490                   |          | 0.028                 |

**Table S4.** Slopes and standard errors (SE) for the slope along with the significance ( $P$ ) for a difference from 0 (no relationship) are provided along with the intercept (Inter.) for the relationship between log-transformed sown species richness and a) the square-root transformed community productivity and b) the log-transformed relative yield. The relationships are shown on the original scale in Fig. 1a. Tests for significance are two-sided for a difference from 0.

| Year | a) Community productivity |       |      |                       | b) Relative yield |       |       |                       |
|------|---------------------------|-------|------|-----------------------|-------------------|-------|-------|-----------------------|
|      | Inter.                    | Slope | SE   | $P$                   | Inter.            | Slope | SE    | $P$                   |
| 2003 | 21.76                     | 2.48  | 0.65 | $1.34 \cdot 10^{-4}$  | 0.642             | 0.105 | 0.045 | 0.018                 |
| 2004 | 21.91                     | 1.79  | 0.65 | 0.006                 | 0.603             | 0.072 | 0.044 | 0.104                 |
| 2005 | 15.26                     | 2.39  | 0.65 | $2.38 \cdot 10^{-4}$  | 0.577             | 0.131 | 0.045 | 0.003                 |
| 2006 | 15.33                     | 3.56  | 0.65 | $5.23 \cdot 10^{-8}$  | 0.614             | 0.200 | 0.045 | $8.33 \cdot 10^{-6}$  |
| 2007 | 16.91                     | 3.86  | 0.65 | $3.07 \cdot 10^{-9}$  | 0.652             | 0.208 | 0.045 | $3.37 \cdot 10^{-6}$  |
| 2008 | 11.26                     | 3.79  | 0.64 | $3.45 \cdot 10^{-9}$  | 0.628             | 0.288 | 0.045 | $1.09 \cdot 10^{-10}$ |
| 2009 | 12.70                     | 3.85  | 0.65 | $2.52 \cdot 10^{-9}$  | 0.550             | 0.244 | 0.045 | $4.55 \cdot 10^{-8}$  |
| 2010 | 11.16                     | 3.21  | 0.64 | $5.84 \cdot 10^{-7}$  | 0.673             | 0.258 | 0.045 | $8.14 \cdot 10^{-9}$  |
| 2011 | 13.18                     | 2.58  | 0.64 | $5.86 \cdot 10^{-5}$  | 0.702             | 0.183 | 0.045 | $4.18 \cdot 10^{-5}$  |
| 2012 | 11.60                     | 3.77  | 0.65 | $6.14 \cdot 10^{-9}$  | 0.534             | 0.250 | 0.045 | $2.62 \cdot 10^{-8}$  |
| 2013 | 11.62                     | 3.17  | 0.64 | $8.77 \cdot 10^{-7}$  | 0.717             | 0.256 | 0.045 | $1.06 \cdot 10^{-8}$  |
| 2014 | 11.29                     | 3.91  | 0.64 | $1.24 \cdot 10^{-9}$  | 0.675             | 0.290 | 0.045 | $9.08 \cdot 10^{-11}$ |
| 2015 | 9.80                      | 3.66  | 0.64 | $1.24 \cdot 10^{-8}$  | 0.673             | 0.322 | 0.045 | $5.88 \cdot 10^{-13}$ |
| 2016 | 7.58                      | 3.74  | 0.64 | $5.79 \cdot 10^{-9}$  | 0.566             | 0.359 | 0.045 | $1.31 \cdot 10^{-15}$ |
| 2017 | 9.05                      | 4.33  | 0.64 | $1.62 \cdot 10^{-11}$ | 0.592             | 0.361 | 0.045 | $5.82 \cdot 10^{-16}$ |
| 2018 | 7.77                      | 4.06  | 0.66 | $7.17 \cdot 10^{-10}$ | 0.531             | 0.373 | 0.046 | $3.98 \cdot 10^{-16}$ |
| 2019 | 6.41                      | 4.88  | 0.65 | $5.36 \cdot 10^{-14}$ | 0.488             | 0.459 | 0.045 | $5.89 \cdot 10^{-25}$ |

**Table S5.** Mixed-model ANOVA results for the change in community productivity relative to community productivity in year 1 (2003) (see also Fig. 1d). Richness is a factor ( $SR_{\text{factor}}$ ) and year is linear ( $Y_{\text{linear}}$ ). The model was fit with the intercept fixed at 0 ( $\log(1)$ ) hence the degrees of freedom for richness is 5. Tests for significance are two-sided.

| Fixed                                         | $DF$ | $DF_{den}$ | $F$   | $P$                   |
|-----------------------------------------------|------|------------|-------|-----------------------|
| $SR_{\text{factor}}$                          | 5    | 30.7       | 17.64 | $1.93 \cdot 10^{-4}$  |
| $Y_{\text{linear}}$                           | 1    | 244.3      | 211.9 | $< 2 \cdot 10^{-16}$  |
| $SR_{\text{factor}} \times Y_{\text{linear}}$ | 4    | 244.3      | 13.79 | $3.73 \cdot 10^{-10}$ |
| Random                                        |      | Var.       | SE    |                       |
| Block                                         |      | 0.041      | 0.046 |                       |
| Plot                                          |      | 0.191      | 0.051 |                       |
| Residual                                      |      | 0.629      | 0.036 |                       |
| Year $\rho_{AR1}$                             |      | 0.498      | 0.028 |                       |

**Table S6.** Mixed-model ANOVA results for assessing the changes in the species richness–yearly biodiversity effects and the species richness–relative yield total (log-transformed) relationships (see also Fig. 2a–d). Species richness was always log-transformed ( $SR_{log}$ ) and the change in the effect of richness was assessed using year as a linear term ( $Y_{linear}$ ) followed by year as a factor with 17 levels ( $Y_{factor}$ ). Outliers that were more than 6 times the inner quartile range above or below the upper and lower quartiles were removed prior to analyses. See Table S7 for analyses with outliers included that influenced the ANOVA results of the complementarity and selection effects. Tests for significance are two-sided.

| Fixed                        | <i>Relative Yield Total (RYT)</i> |                         |           |                      | <i>Net effect</i> |                         |              |                      |
|------------------------------|-----------------------------------|-------------------------|-----------|----------------------|-------------------|-------------------------|--------------|----------------------|
|                              | <i>DF</i>                         | <i>DF<sub>den</sub></i> | <i>F</i>  | <i>P</i>             | <i>DF</i>         | <i>DF<sub>den</sub></i> | <i>F</i>     | <i>P</i>             |
| $SR_{log}$                   | 1                                 | 57.8                    | 50.49     | $1.81 \cdot 10^{-9}$ | 1                 | 57.3                    | 40.91        | $2.84 \cdot 10^{-8}$ |
| $Y_{linear}$                 | 1                                 | 588.9                   | 8.32      | 0.958                | 1                 | 474.1                   | 28.91        | 0.493                |
| $Y_{factor}$                 | 14                                | 732.5                   | 2.57      | 0.001                | 15                | 872.5                   | 10.17        | $< 2 \cdot 10^{-16}$ |
| $SR_{log} \times Y_{linear}$ | 1                                 | 495.2                   | 7.33      | 0.007                | 1                 | 290.1                   | 1.00         | 0.318                |
| $SR_{log} \times Y_{factor}$ | 14                                | 738.2                   | 0.55      | 0.901                | 15                | 872.8                   | 1.41         | 0.135                |
| Random                       |                                   | Var. $10^3$             | SE $10^3$ |                      |                   | Var. $10^{-3}$          | SE $10^{-3}$ |                      |
| Block                        |                                   | 9.46                    | 15.35     |                      |                   | 0.59                    | 0.99         |                      |
| Plot                         |                                   | 97.84                   | 26.93     |                      |                   | 4.97                    | 1.88         |                      |
| Residual                     |                                   | 529.67                  | 27.14     |                      |                   | 33.55                   | 1.99         |                      |
| Year $\rho_{ARI}$            |                                   | 0.120                   | 0.039     |                      |                   | 0.44                    | 0.03         |                      |

  

| Fixed                        | <i>Complementarity effect</i> |                         |              |                      | <i>Selection effect</i> |                         |              |                      |
|------------------------------|-------------------------------|-------------------------|--------------|----------------------|-------------------------|-------------------------|--------------|----------------------|
|                              | <i>DF</i>                     | <i>DF<sub>den</sub></i> | <i>F</i>     | <i>P</i>             | <i>DF</i>               | <i>DF<sub>den</sub></i> | <i>F</i>     | <i>P</i>             |
| $SR_{log}$                   | 1                             | 57.4                    | 39.87        | $3.87 \cdot 10^{-8}$ | 1                       | 61.3                    | 22.04        | $1.27 \cdot 10^{-5}$ |
| $Y_{linear}$                 | 1                             | 623.1                   | 4.02         | 0.449                | 1                       | 606.1                   | 1.05         | 0.673                |
| $Y_{factor}$                 | 14                            | 746.6                   | 1.42         | 0.140                | 14                      | 677.4                   | 0.92         | 0.540                |
| $SR_{log} \times Y_{linear}$ | 1                             | 417.7                   | 0.01         | 0.932                | 1                       | 397.7                   | 0.00         | 0.975                |
| $SR_{log} \times Y_{factor}$ | 14                            | 750.5                   | 0.91         | 0.545                | 14                      | 685.8                   | 0.95         | 0.500                |
| Random                       |                               | Var. $10^{-4}$          | SE $10^{-4}$ |                      |                         | Var. $10^{-4}$          | SE $10^{-4}$ |                      |
| Block                        |                               | -0.48                   | 0.53         |                      |                         | <0.01                   | <0.01        |                      |
| Plot                         |                               | 10.33                   | 3.17         |                      |                         | 9.52                    | 2.69         |                      |
| Residual                     |                               | 79.04                   | 3.98         |                      |                         | 59.81                   | 3.14         |                      |
| Year $\rho_{ARI}$            |                               | 0.09                    | 0.04         |                      |                         | 0.06                    | 0.04         |                      |

**Table S7.** Mixed-model ANOVA results with (a) no outliers removed and (b) the top three most extreme outliers removed for assessing the changes in the species richness–yearly biodiversity effects and the species richness–relative yield total (log-transformed) relationships. Species richness was always log-transformed ( $SR_{log}$ ) and the change in the effect of richness was assessed using year as a linear term ( $Y_{linear}$ ) followed by year as a factor with 17 levels ( $Y_{factor}$ ). Tests for significance are two-sided.

| a)                           |                               |                         |           |          |                         |                         |           |          |  |
|------------------------------|-------------------------------|-------------------------|-----------|----------|-------------------------|-------------------------|-----------|----------|--|
| Fixed                        | <i>Complementarity effect</i> |                         |           |          | <i>Selection effect</i> |                         |           |          |  |
|                              | <i>DF</i>                     | <i>DF<sub>den</sub></i> | <i>F</i>  | <i>P</i> | <i>DF</i>               | <i>DF<sub>den</sub></i> | <i>F</i>  | <i>P</i> |  |
| $SR_{log}$                   | 1                             | 57.7                    | 0.07      | 0.795    | 1                       | 343.1                   | 0.01      | 0.926    |  |
| $Y_{linear}$                 | 1                             | 674.2                   | 0.01      | 0.717    | 1                       | 766.6                   | 0.00      | 0.772    |  |
| $Y_{factor}$                 | 14                            | 797.5                   | 1.25      | 0.232    | 14                      | 783.0                   | 1.42      | 0.136    |  |
| $SR_{log} \times Y_{linear}$ | 1                             | 440.6                   | 0.03      | 0.873    | 1                       | 514.6                   | 0.03      | 0.853    |  |
| $SR_{log} \times Y_{factor}$ | 14                            | 798.3                   | 0.17      | 1.000    | 14                      | 788.0                   | 0.22      | 0.999    |  |
| Random                       | Var. $10^8$                   |                         | SE $10^8$ |          | Var. $10^8$             |                         | SE $10^8$ |          |  |
| Block                        | -0.08                         |                         | 0.28      |          | 0.00                    |                         | 0.00      |          |  |
| Plot                         | -0.11                         |                         | 1.31      |          | 0.00                    |                         | 0.00      |          |  |
| Residual                     | 102.86                        |                         | 4.88      |          | 110.68                  |                         | 5.27      |          |  |
| Year $\rho_{ARI}$            | -0.001                        |                         | 0.035     |          | -0.002                  |                         | 0.034     |          |  |

  

| b)                           |                               |                         |           |          |                         |                         |              |          |  |
|------------------------------|-------------------------------|-------------------------|-----------|----------|-------------------------|-------------------------|--------------|----------|--|
| Fixed                        | <i>Complementarity effect</i> |                         |           |          | <i>Selection effect</i> |                         |              |          |  |
|                              | <i>DF</i>                     | <i>DF<sub>den</sub></i> | <i>F</i>  | <i>P</i> | <i>DF</i>               | <i>DF<sub>den</sub></i> | <i>F</i>     | <i>P</i> |  |
| $SR_{log}$                   | 1                             | 57.8                    | 6.56      | 0.013    | 1                       | 64.7                    | 5.25         | 0.028    |  |
| $Y_{linear}$                 | 1                             | 664.4                   | 3.61      | 0.147    | 1                       | 670.2                   | 2.99         | 0.139    |  |
| $Y_{factor}$                 | 14                            | 789.0                   | 1.47      | 0.117    | 14                      | 735.1                   | 1.49         | 0.109    |  |
| $SR_{log} \times Y_{linear}$ | 1                             | 439.8                   | 0.02      | 0.883    | 1                       | 430.1                   | 0.08         | 0.774    |  |
| $SR_{log} \times Y_{factor}$ | 14                            | 789.3                   | 0.54      | 0.910    | 14                      | 742.6                   | 0.43         | 0.967    |  |
| Random                       | Var. $10^8$                   |                         | SE $10^8$ |          | Var. $10^{-4}$          |                         | SE $10^{-4}$ |          |  |
| Block                        | -0.03                         |                         | 0.02      |          | 0.00                    |                         | 0.00         |          |  |
| Plot                         | 0.19                          |                         | 0.14      |          | 19.74                   |                         | 15.53        |          |  |
| Residual                     | 8.93                          |                         | 0.42      |          | 964.40                  |                         | 47.64        |          |  |
| Year $\rho_{ARI}$            | -0.036                        |                         | 0.036     |          | -0.037                  |                         | 0.038        |          |  |



**Table S8.** Mixed-model ANOVA results of the analysis of the community stability, population stability and asynchrony. The log of species richness is a linear term ( $SR_{\log}$ ) along a five-year rolling window (13 consecutive 5-year windows) as linear ( $W_{\text{linear}}$ ) to assess components of stability changed through time followed by window as a factor ( $W_{\text{factor}}$ ) to assess whether effects varied among the five-year windows (see also Fig. 3). Community and population stability was log-transformed prior to analyses. Tests for significance are two-sided.

| Community stability ( $CV_{net}^{-1}$ )  |      |               |              |                      |
|------------------------------------------|------|---------------|--------------|----------------------|
| Fixed                                    | $DF$ | $DF_{den}$    | $F$          | $P$                  |
| $SR_{\log}$                              | 1    | 74            | 44.99        | $1.23 \cdot 10^{-9}$ |
| $W_{\text{linear}}$                      | 1    | 888.0         | 0.13         | 0.008                |
| $W_{\text{factor}}$                      | 11   | 888.0         | 2.66         | 0.002                |
| $SR_{\log} \times W_{\text{linear}}$     | 1    | 888.0         | 14.23        | $1.16 \cdot 10^{-5}$ |
| $SR_{\log} \times W_{\text{factor}}$     | 11   | 888.0         | 0.46         | 0.929                |
| Random                                   |      | Var $10^3$    | SE $10^3$    |                      |
| Block                                    |      | <0.01         | <0.01        |                      |
| Plot                                     |      | 89.94         | 16.68        |                      |
| Residual                                 |      | 149.20        | 7.08         |                      |
| Population stability ( $CV_{pop}^{-1}$ ) |      |               |              |                      |
| Fixed                                    | $DF$ | $DF_{den}$    | $F$          | $P$                  |
| $SR_{\log}$                              | 1    | 74.0          | 4.97         | 0.029                |
| $W_{\text{linear}}$                      | 1    | 888.0         | 0.83         | 0.019                |
| $W_{\text{factor}}$                      | 11   | 888.0         | 0.89         | 0.553                |
| $SR_{\log} \times W_{\text{linear}}$     | 1    | 888.0         | 17.43        | $3.28 \cdot 10^{-5}$ |
| $SR_{\log} \times W_{\text{factor}}$     | 11   | 888.0         | 0.48         | 0.917                |
| Random                                   |      | Var $10^{-3}$ | SE $10^{-3}$ |                      |
| Block                                    |      | 0.00          | 0.00         |                      |
| Plot                                     |      | 70.02         | 12.79        |                      |
| Residual                                 |      | 100.86        | 4.79         |                      |
| Asynchrony ( $1-\theta$ )                |      |               |              |                      |
| Fixed                                    | $DF$ | $DF_{den}$    | $F$          | $P$                  |
| $SR_{\log}$                              | 1    | 71.2          | 260.70       | $< 2 \cdot 10^{-16}$ |
| $W_{\text{linear}}$                      | 1    | 888.0         | 0.86         | 0.272                |
| $W_{\text{factor}}$                      | 11   | 888.0         | 2.11         | 0.017                |
| $SR_{\log} \times W_{\text{linear}}$     | 1    | 888.0         | 0.29         | 0.591                |
| $SR_{\log} \times W_{\text{factor}}$     | 11   | 888.0         | 1.49         | 0.129                |
| Random                                   |      | Var $10^{-3}$ | SE $10^{-3}$ |                      |
| Block                                    |      | 0.49          | 0.87         |                      |
| Plot                                     |      | 9.61          | 1.84         |                      |
| Residual                                 |      | 17.70         | 0.84         |                      |

**Table S9.** Mixed-model ANOVA results of the analysis of the community stability, population stability and asynchrony. The log of species richness is a linear term ( $SR_{\log}$ ) along a three-year rolling window (15 consecutive three-year windows) as linear ( $W_{\text{linear}}$ ) to assess components of stability changed through time followed by window as a factor ( $W_{\text{factor}}$ ) to assess whether effects varied among the three-year windows (see also Fig. 3). Population stability was log transformed and community stability and asynchrony were square root-transformed prior to analyses to improve homoscedasticity. Tests for significance are two-sided.

| Community stability ( $CV_{net}^{-1}$ )  |      |               |              |                       |
|------------------------------------------|------|---------------|--------------|-----------------------|
| Fixed                                    | $DF$ | $DF_{den}$    | $F$          | $P$                   |
| $SR_{\log}$                              | 1    | 73.9          | 54.20        | $1.92 \cdot 10^{-10}$ |
| $W_{\text{linear}}$                      | 1    | 1033.2        | 2.50         | 0.023                 |
| $W_{\text{factor}}$                      | 13   | 1033.9        | 5.30         | $3.24 \cdot 10^{-09}$ |
| $SR_{\log} \times W_{\text{linear}}$     | 1    | 1033.1        | 10.40        | 0.001                 |
| $SR_{\log} \times W_{\text{factor}}$     | 13   | 1033.0        | 0.60         | 0.891                 |
| Random                                   |      | Var $10^3$    | SE $10^3$    |                       |
| Block                                    |      | 0.00          | 0.00         |                       |
| Plot                                     |      | 5.98          | 1.30         |                       |
| Residual                                 |      | 28,36         | 1.25         |                       |
| Population stability ( $CV_{pop}^{-1}$ ) |      |               |              |                       |
| Fixed                                    | $DF$ | $DF_{den}$    | $F$          | $P$                   |
| $SR_{\log}$                              | 1    | 74.0          | 3.35         | 0.073                 |
| $W_{\text{linear}}$                      | 1    | 1033.3        | 4.99         | 0.002                 |
| $W_{\text{factor}}$                      | 13   | 1033.0        | 4.62         | $8.73 \cdot 10^{-8}$  |
| $SR_{\log} \times W_{\text{linear}}$     | 1    | 1033.2        | 14.57        | $1.43 \cdot 10^{-5}$  |
| $SR_{\log} \times W_{\text{factor}}$     | 13   | 1033.1        | 0.44         | 0.956                 |
| Random                                   |      | Var $10^{-3}$ | SE $10^{-3}$ |                       |
| Block                                    |      | 0.00          | 0.00         |                       |
| Plot                                     |      | 63.0          | 13.0         |                       |
| Residual                                 |      | 240.1         | 10.6         |                       |
| Asynchrony ( $1-\theta$ )                |      |               |              |                       |
| Fixed                                    | $DF$ | $DF_{den}$    | $F$          | $P$                   |
| $SR_{\log}$                              | 1    | 71.3          | 265.60       | $< 2 \cdot 10^{-16}$  |
| $W_{\text{linear}}$                      | 1    | 1033.5        | 0.20         | 0.603                 |
| $W_{\text{factor}}$                      | 13   | 1033.1        | 1.82         | 0.035                 |
| $SR_{\log} \times W_{\text{linear}}$     | 1    | 1033.4        | 0.02         | 0.886                 |
| $SR_{\log} \times W_{\text{factor}}$     | 13   | 1033.3        | 1.04         | 0.408                 |
| Random                                   |      | Var $10^{-3}$ | SE $10^{-3}$ |                       |
| Block                                    |      | 0.57          | 0.86         |                       |
| Plot                                     |      | 6.41          | 1.54         |                       |
| Residual                                 |      | 40.79         | 1.79         |                       |

**Table S10.** Results from the multigroup structural equation model showing the pairwise differences (*Diff*) in coefficients between the groups of non-overlapping five-year windows: 1 = years 2003–2007, 2 = years 2009–2013, 3 = years 2015–2019. Tests for significance are two-sided. No adjustment was made for comparisons among groups.

| Effects of richness on: |                      |             |                  |                      |             |              |                   |             |              |                      |           |          |                   |           |          |
|-------------------------|----------------------|-------------|------------------|----------------------|-------------|--------------|-------------------|-------------|--------------|----------------------|-----------|----------|-------------------|-----------|----------|
| Group                   | <i>CE</i>            |             |                  | <i>SE</i>            |             |              | <i>ANPP</i>       |             |              | Population stability |           |          | <i>Asynchrony</i> |           |          |
|                         | <i>Diff</i>          | <i>SE</i>   | <i>P</i>         | <i>Diff</i>          | <i>SE</i>   | <i>P</i>     | <i>Diff</i>       | <i>SE</i>   | <i>P</i>     | <i>Diff</i>          | <i>SE</i> | <i>P</i> | <i>Diff</i>       | <i>SE</i> | <i>P</i> |
| 1 vs 2                  | -0.16                | 0.21        | 0.324            | 0.34                 | 0.22        | 0.053        | 0.11              | 0.16        | 0.267        | -0.18                | 0.21      | 0.391    | -0.21             | 0.17      | 0.280    |
| 1 vs 3                  | -0.19                | 0.22        | 0.253            | <b>0.41</b>          | <b>0.23</b> | <b>0.026</b> | -0.15             | 0.18        | 0.708        | -0.11                | 0.22      | 0.624    | 0.08              | 0.19      | 0.809    |
| 2 vs 3                  | -0.03                | 0.21        | 0.841            | 0.07                 | 0.23        | 0.699        | -0.26             | 0.14        | 0.070        | 0.07                 | 0.24      | 0.778    | 0.29              | 0.19      | 0.223    |
| Effects of CE on:       |                      |             |                  |                      |             |              |                   |             |              |                      |           |          |                   |           |          |
| Group                   | <i>ANPP</i>          |             |                  | Population stability |             |              | <i>Asynchrony</i> |             |              |                      |           |          |                   |           |          |
|                         | <i>Diff</i>          | <i>SE</i>   | <i>P</i>         | <i>Diff</i>          | <i>SE</i>   | <i>P</i>     | <i>Diff</i>       | <i>SE</i>   | <i>P</i>     |                      |           |          |                   |           |          |
| 1 vs 2                  | <b>-0.87</b>         | <b>0.16</b> | <b>&lt;0.001</b> | <b>0.86</b>          | <b>0.30</b> | <b>0.003</b> | 0.06              | 0.18        | 0.795        |                      |           |          |                   |           |          |
| 1 vs 3                  | -0.36                | 0.19        | 0.269            | 0.32                 | 0.26        | 0.216        | <b>-0.69</b>      | <b>0.23</b> | <b>0.006</b> |                      |           |          |                   |           |          |
| 2 vs 3                  | 0.51                 | 0.18        | 0.053            | -0.54                | 0.37        | 0.110        | <b>-0.75</b>      | <b>0.25</b> | <b>0.006</b> |                      |           |          |                   |           |          |
| Effects of SE on:       |                      |             |                  |                      |             |              |                   |             |              |                      |           |          |                   |           |          |
| Group                   | <i>ANPP</i>          |             |                  | Population stability |             |              | <i>Asynchrony</i> |             |              |                      |           |          |                   |           |          |
|                         | <i>Diff</i>          | <i>SE</i>   | <i>P</i>         | <i>Diff</i>          | <i>SE</i>   | <i>P</i>     | <i>Diff</i>       | <i>SE</i>   | <i>P</i>     |                      |           |          |                   |           |          |
| 1 vs 2                  | -0.42                | 0.15        | 0.138            | <b>0.57</b>          | <b>0.25</b> | <b>0.023</b> | <b>0.47</b>       | <b>0.17</b> | <b>0.024</b> |                      |           |          |                   |           |          |
| 1 vs 3                  | -0.19                | 0.18        | 0.719            | <b>0.63</b>          | <b>0.23</b> | <b>0.014</b> | -0.26             | 0.21        | 0.216        |                      |           |          |                   |           |          |
| 2 vs 3                  | 0.23                 | 0.16        | 0.327            | 0.06                 | 0.31        | 0.981        | <b>-0.73</b>      | <b>0.22</b> | <b>0.004</b> |                      |           |          |                   |           |          |
| Effects of ANPP on:     |                      |             |                  |                      |             |              |                   |             |              |                      |           |          |                   |           |          |
| Group                   | population stability |             |                  |                      |             |              |                   |             |              |                      |           |          |                   |           |          |
|                         | <i>Diff</i>          | <i>SE</i>   | <i>P</i>         |                      |             |              |                   |             |              |                      |           |          |                   |           |          |
| 1 vs 2                  | -0.21                | 0.27        | 0.035            |                      |             |              |                   |             |              |                      |           |          |                   |           |          |
| 1 vs 3                  | <b>-0.23</b>         | <b>0.22</b> | <b>0.028</b>     |                      |             |              |                   |             |              |                      |           |          |                   |           |          |
| 2 vs 3                  | -0.02                | 0.32        | 0.802            |                      |             |              |                   |             |              |                      |           |          |                   |           |          |

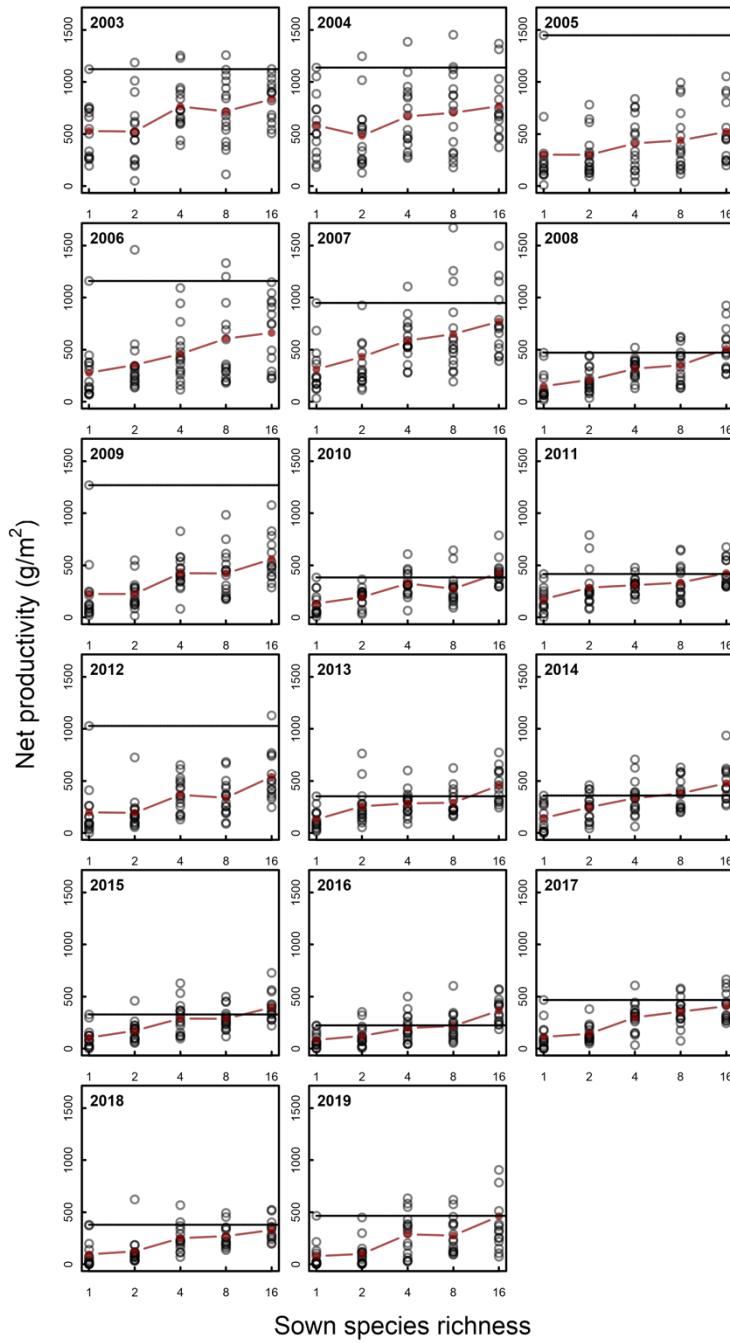

**Fig S1.** Scatterplots of the raw biomass data for each plot (points) are shown for each of the 17 years where community productivity was collected. The red line highlights the trend between consecutive sown species richness means. The dashed line highlights the most productive monoculture.

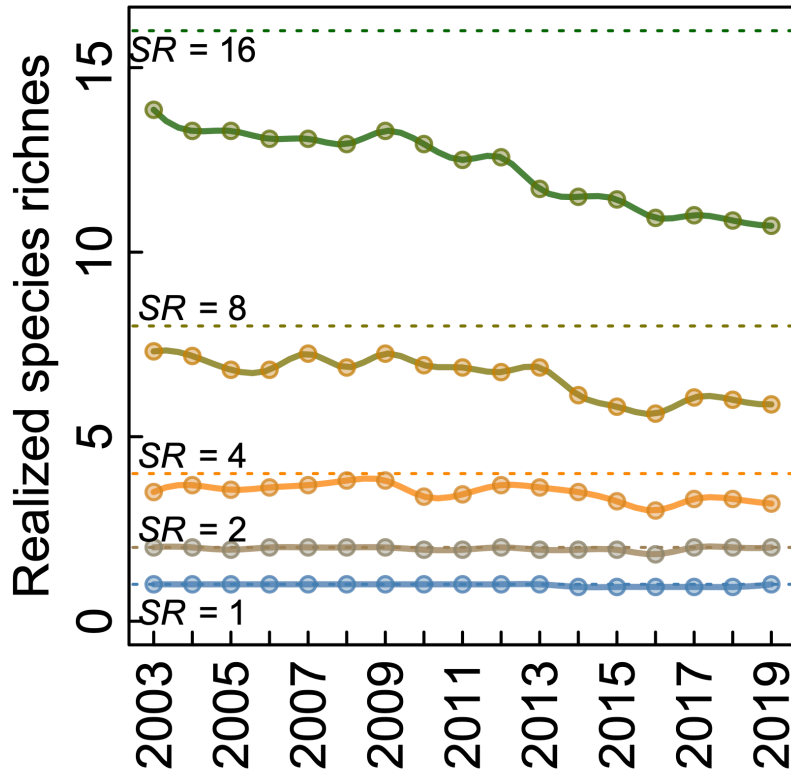

**Fig. S2.** Change in species realized richness over the 17-year period for each sown richness level. Dotted lines highlight the initial sown species richness (SR).

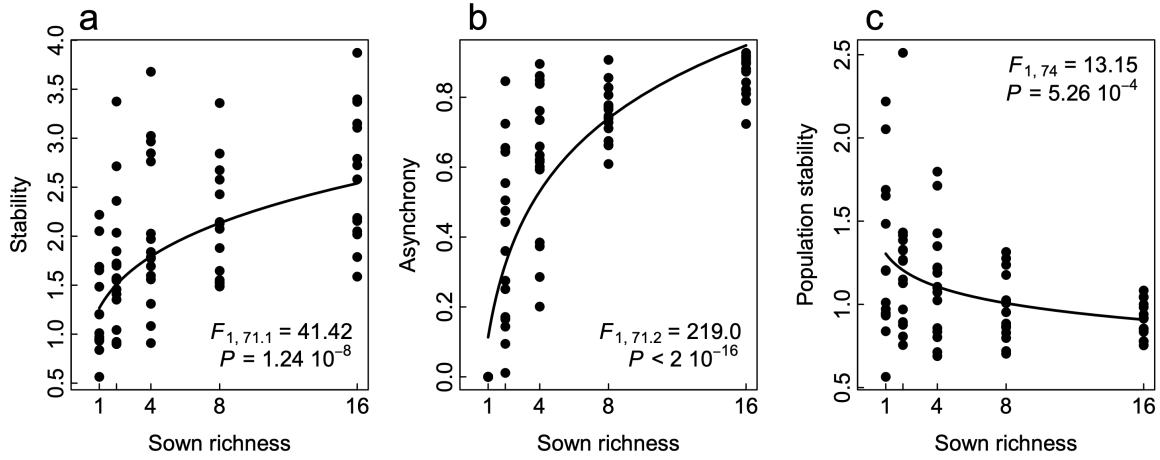

**Fig. S3.** Scatter plots showing the relationship between sown species richness and (a) stability ( $CV_{net}^{-1}$ ), (b) asynchrony and (c) population stability ( $CV_{pop}^{-1}$ ) over the entire 17-year period. Solid lines are the regression trends for the log-log relationship and associated ANOVA results for the relationship are provided. Tests for significance are two-sided.

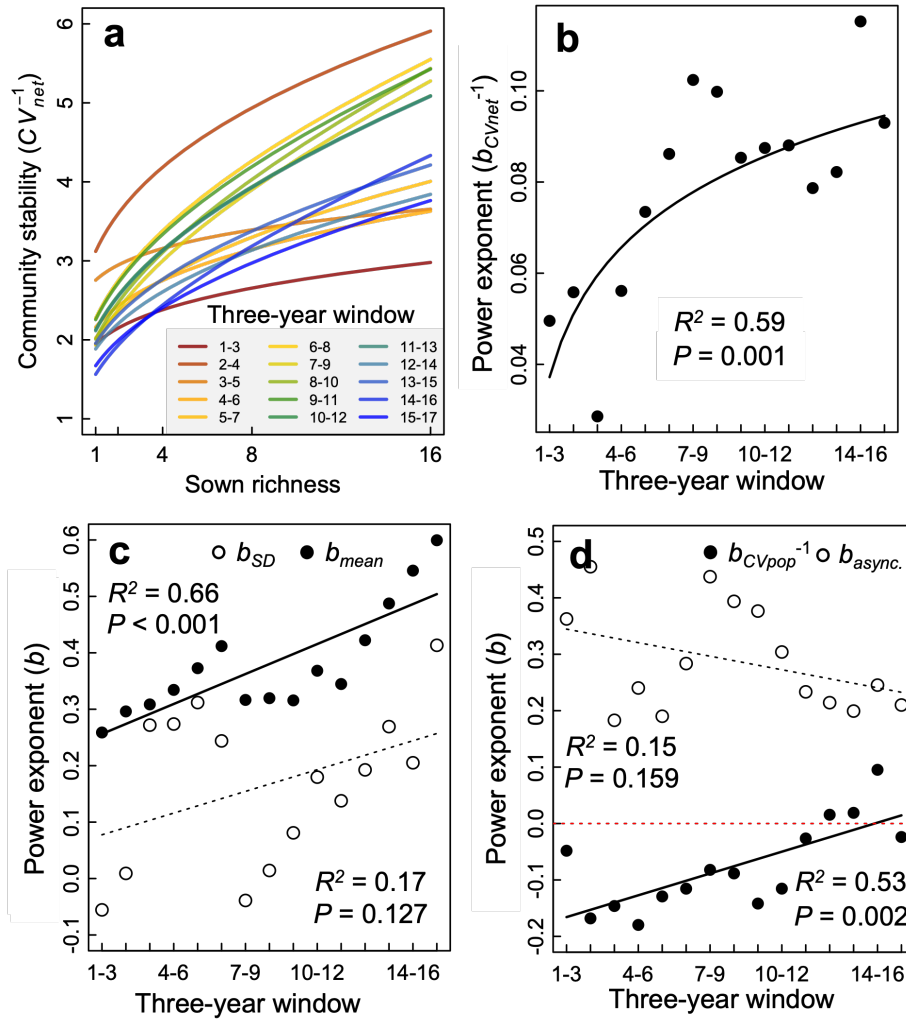

**Fig. S4.** Effects of species richness on community stability and its underlying components.

In (a) the richness–community stability ( $CV_{net}^{-1}$ ) relationships are shown for each three-year window indicated by different colors (1 = 2003, 17 = 2019). (b) The change in the slope of the log–log relationship between richness and community stability (power exponent  $b$  of curves shown in a) for each consecutive three-year rolling window. The solid regression line was fit using the relationship slope  $\sim \log(\text{window})$ . Similarly, (c) are the regression coefficients of richness on the three-year temporal mean and SD in community productivity and (d) on the population stability ( $CV_{pop}^{-1}$ ) and asynchrony (async.) of the log–log relationships. These coefficients are relative effects of richness on community stability as  $b_{mean} - b_{SD}$  and  $b_{async} + b_{CV_{pop}^{-1}}$  are the slope of the log–log relationship between richness and community stability ( $b_{CV_{net}^{-1}}$ ) shown in (b) (see Methods). Black and dashed regression lines respectively highlight significant and non-significant trends along the rolling windows. Tests for significance are two-sided.

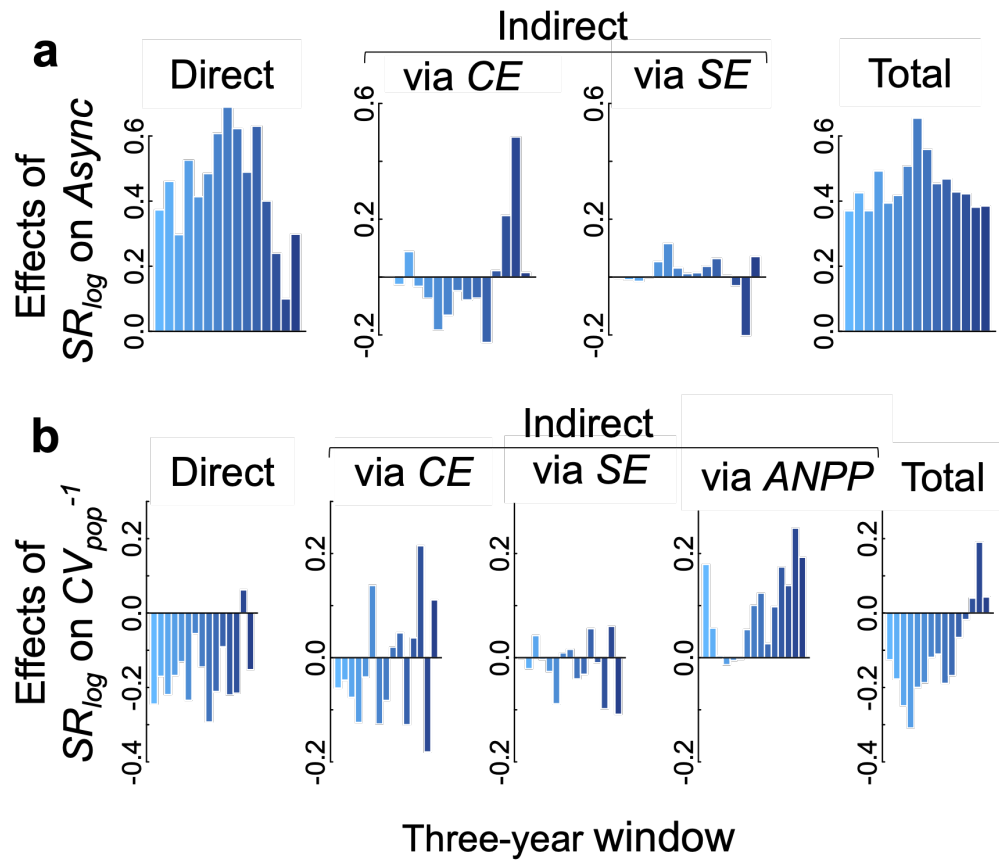

**Fig. S5.** The direct effects, indirect effects, and the total summed effect, of species richness on **a** asynchrony and **b** population stability for each of the sequential three-year rolling windows (light blue = 2003 – 2005 to dark blue 2017 – 2019).



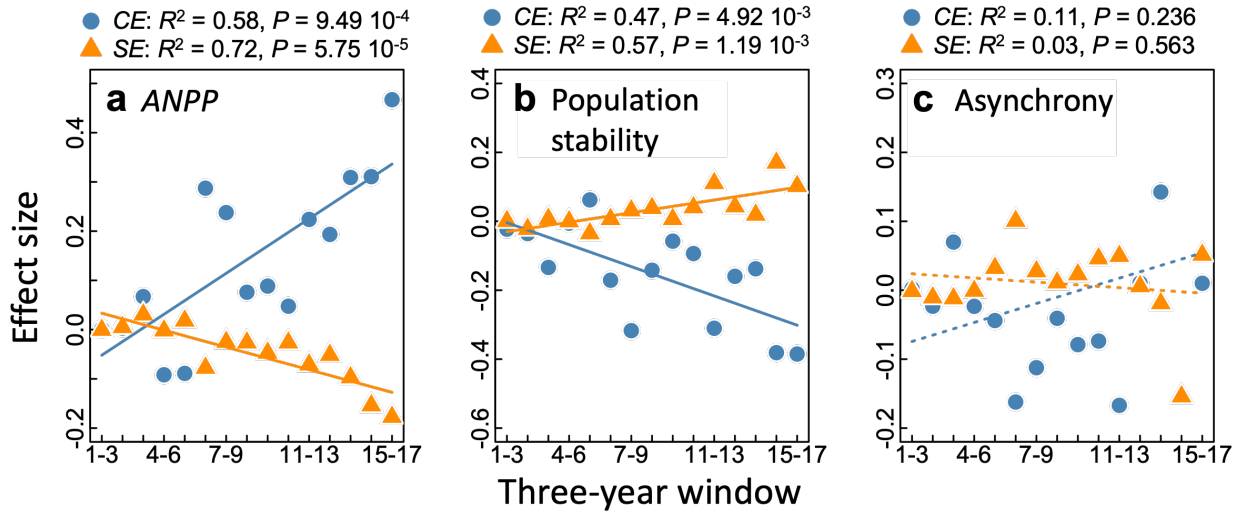

**Fig. S6.** Indirect effects of species richness on community stability the three-year complementarity (*CE*) and selection (*SE*) effects across three-year rolling windows. **a** indirect effects through the *CE* and *SE* on community stability by their effects on *ANPP* (richness → *CE/SE* → *ANPP* → population stability → community stability), **b** by their effects on population stability (richness → *CE/SE* → population stability → community stability), and **c** by their effects on asynchrony (richness → *CE/SE* → Asynchrony → community stability). Solid lines indicate significant regression trends and dotted lines non-significant trends. Tests for significance are two-sided for a difference from 0.
